# Supplementary material for: Variant spectrum of von Hippel–Lindau disease and its genomic heterogeneity in Japan
Source: PubMed Central journal article supplement — Hum Mol Genet. 2023 Mar 11;32(12):2046–54. doi: 10.1093/hmg/ddad039 (PMC10244221; doi:10.1093/hmg/ddad039), 2023-03-11
Supplement: supple_fig_vhl_ddad039.pdf [file supple_fig_vhl_ddad039.pdf]

# Supplementary Figure 1

GO analysis in VHL pathways for deleterious mutation detected in 22 unsolved NVI cases

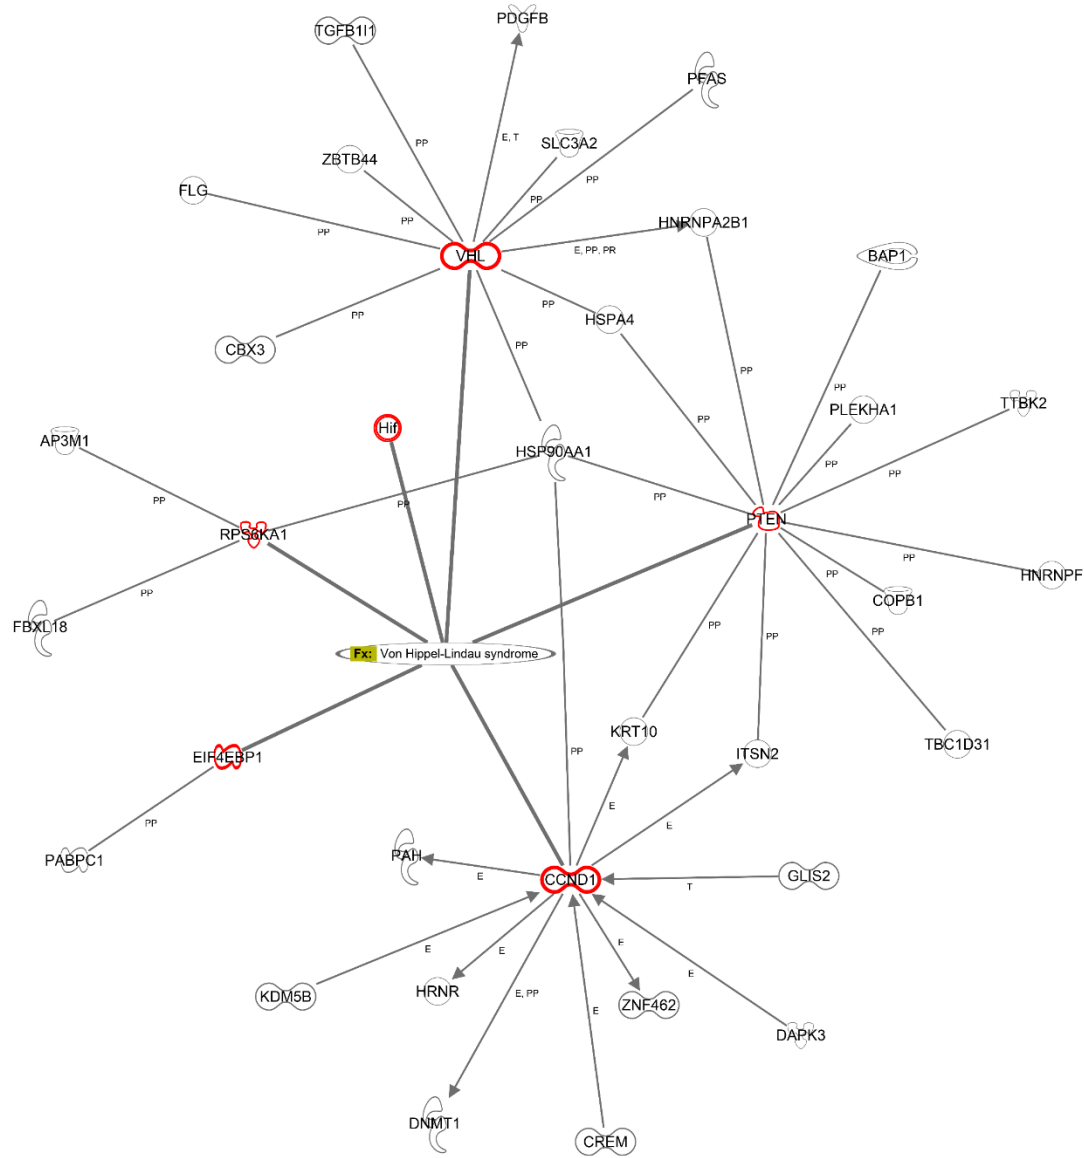

# Supplementary Figure2. IGV shows a SV candidate of *TSC1* gene in VHL NVI case

*TSC1* exon7 (chr9:135797248 possible 153 bp insertion) in NIM Case08

VHL\_08

BBJ: W18

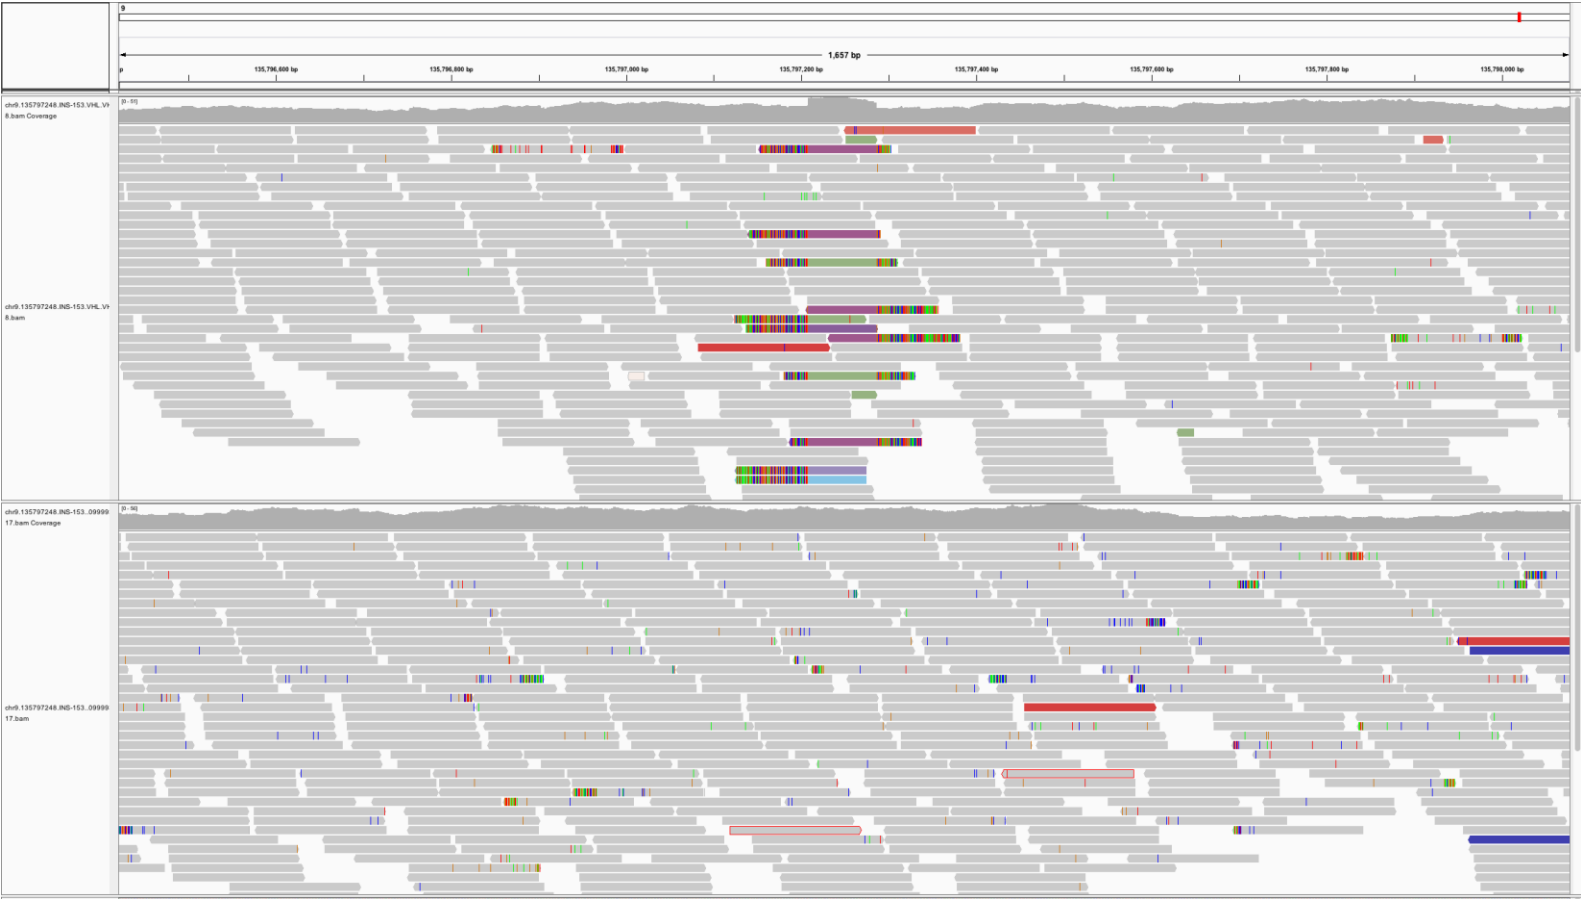

# Supplementary Figure 3. ME insertion of *VHL* was derived from SVA in *PHKA1* intron at chromosome X.

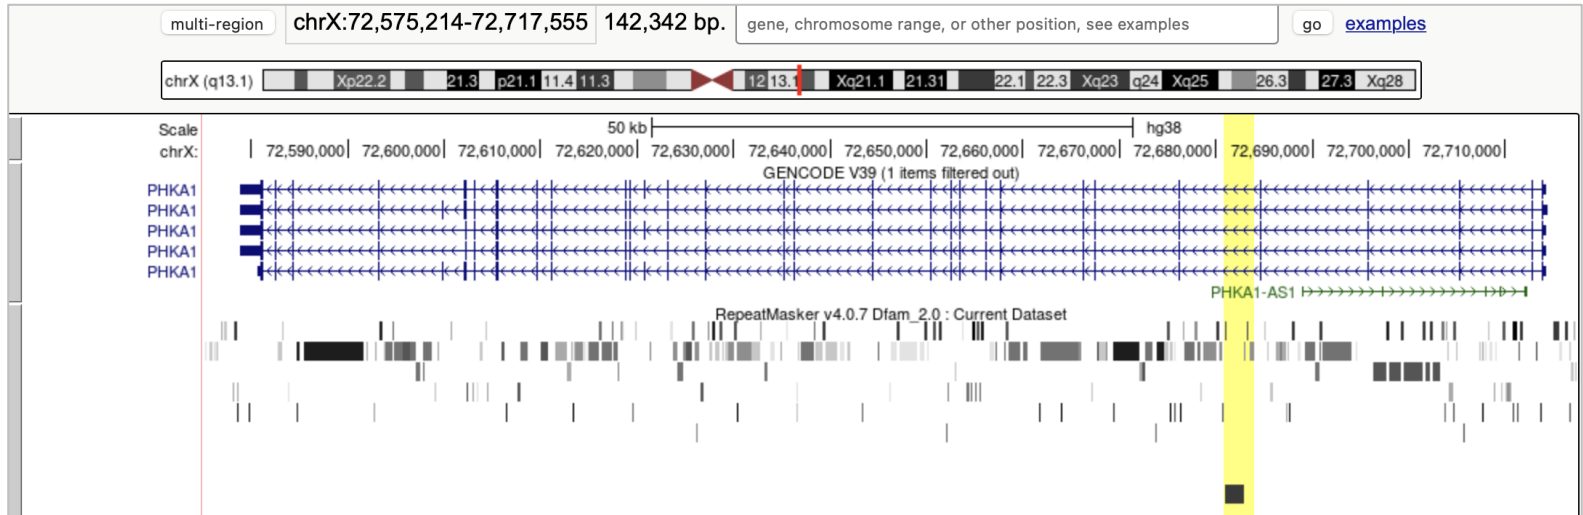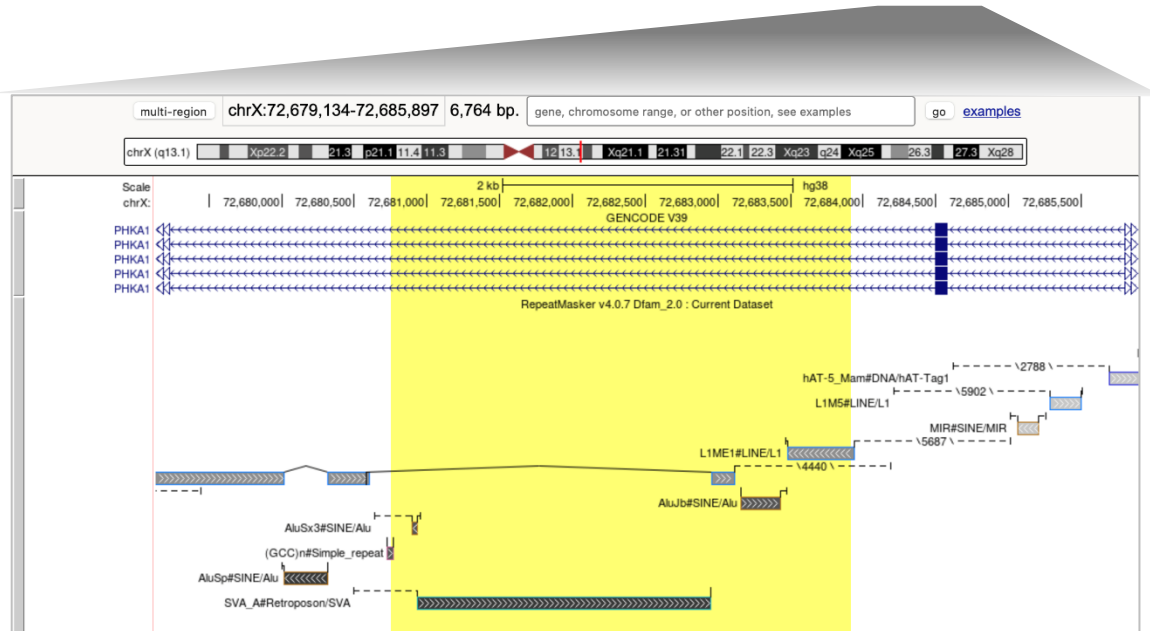

**Supplementary Figure 4.** Sanger sequencing validated mosaic mutations of *VHL* in NVI Case6 (c.T506C, AF 8.42%) and NVI Case15 (c.C481T, AF21.94%).

NVI Case6

Forward sequencing

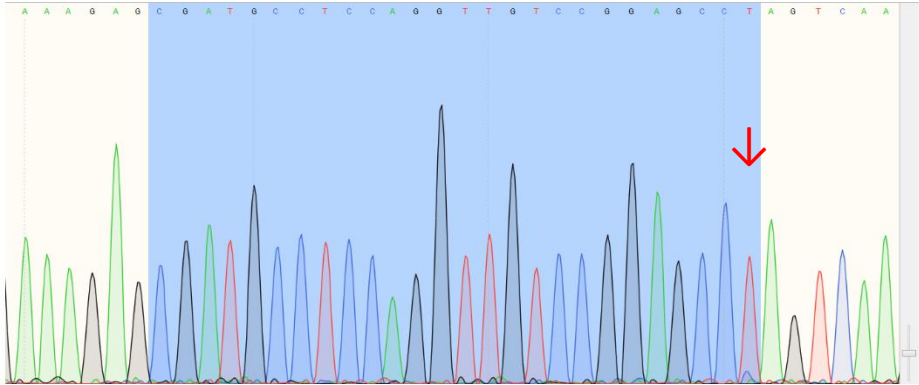

Reverse sequencing

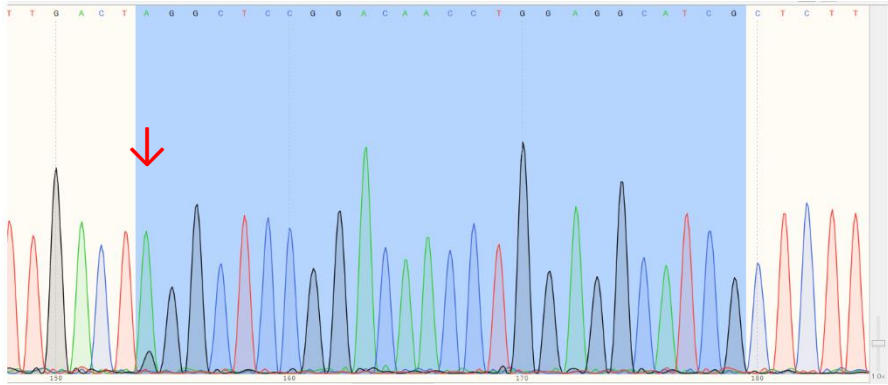

c.T506C

NVI Case15

Forward sequencing

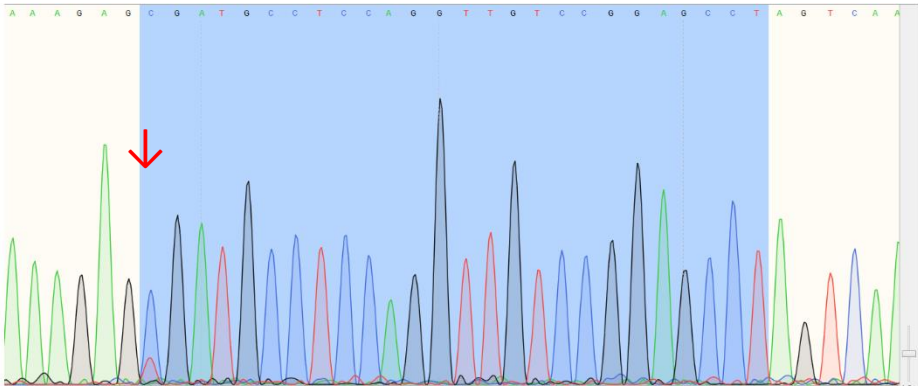

Reverse sequencing

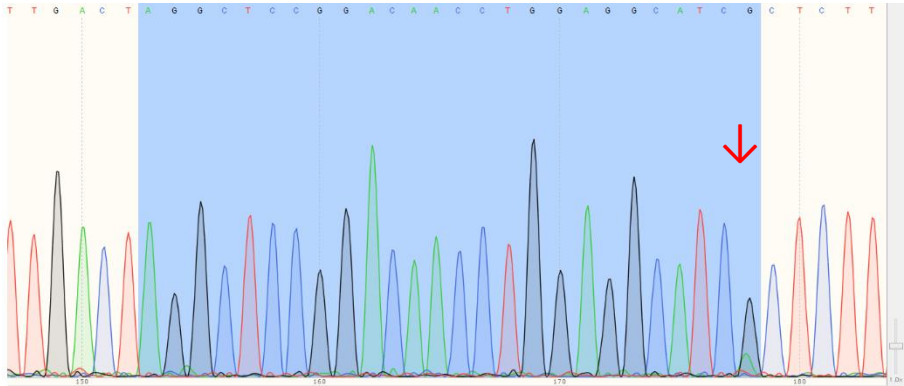

c.C481T
